# Supplementary material for: Design, Synthesis, Antibacterial, Antifungal and Anticancer Evaluations of Novel β-Pinene Quaternary Ammonium Salts
Source: MDPI journal article supplement (doi:10.3390/ijms222011299), 2021-10-19
Supplement: s1 [file s1]

## Supplementary Materials

# Design, Synthesis, Antibacterial, Antifungal and Anticancer Evaluations of Novel $\beta$ -Pinene Quaternary Ammonium Salts

Li Zhang <sup>1,†</sup>, Xue-Zhen Feng <sup>2,†</sup>, Zhuan-Quan Xiao <sup>3</sup>, Guo-Rong Fan <sup>1</sup>, Shang-Xing Chen <sup>1</sup>, Sheng-Liang Liao <sup>1</sup>, Hai Luo <sup>1,\*</sup> and Zong-De Wang <sup>1,\*</sup>

<sup>1</sup> East China Woody Fragrance and Flavor Engineering Research Center of National Forestry and Grassland Administration, Camphor Engineering Research Center of National Forestry and Grassland Administration/Jiangxi Province, College of Forestry, Jiangxi Agricultural University, Nanchang 330045, China; zhangli\_miaomuli@163.com (L.Z.); fgr1971@163.com (G.-R.F.); csxing@126.com (S.-X.C.); liaosl@jxau.edu.cn (S.-L.L.)

<sup>2</sup> National Engineering Laboratory for Biomass Chemical Utilization, Institute of Chemical Industry of Forest Products, Chinese Academy of Forestry, Nanjing 210042, China; xuezhen\_\_feng@163.com

<sup>3</sup> College of Chemistry, Jiangxi Normal University, Nanchang 330022, China; xiaozhq3501@163.com

\* Correspondence: luohai87@126.com (H.L.); jxzongdewang@163.com (Z.-D.W.)

† The first two authors contributed equally to the work.

**Table S1.** The antifungal activities of  $\beta$ -Pinene quaternary ammonium salts against ten fungi.

| Com. | Fungi | Testing the concentration ( $\mu\text{g/mL}$ ) |        |        |       |       |       |       | EC <sub>50</sub> | R <sup>2</sup> | Toxic regression equation |
|------|-------|------------------------------------------------|--------|--------|-------|-------|-------|-------|------------------|----------------|---------------------------|
|      |       | 200.00                                         | 100.00 | 50.00  | 25.00 | 12.50 | 6.25  | 3.13  |                  |                |                           |
| 4a   | A     | 99.50                                          | 96.28  | 95.04  | 80.40 | 74.44 | 60.09 | 43.20 | 4.50             | 0.9870         | y=4.0474+1.4589x          |
|      | B     | 100.00                                         | 100.00 | 98.24  | 78.19 | 53.08 | 33.80 |       | 10.92            | 0.9585         | y=0.7439+4.0966x          |
|      | C     | 96.01                                          | 81.05  | 69.83  | 54.61 | 23.19 |       |       | 27.09            | 0.9860         | y=2.2715+1.9043x          |
|      | D     | 99.77                                          | 94.48  | 91.49  | 73.56 | 58.85 | 43.24 |       | 9.45             | 0.9760         | y=3.1591+1.8869x          |
|      | E     | 85.57                                          | 70.63  | 59.49  | 41.27 | 33.67 |       |       | 31.98            | 0.9910         | y=3.1360+1.2386x          |
|      | F     | 99.21                                          | 90.81  | 83.20  | 69.82 | 44.88 |       |       | 15.09            | 0.9810         | y=2.6912+1.9587x          |
|      | G     | 100.00                                         | 100.00 | 100.00 | 75.40 | 35.29 | 20.77 |       | 10.82            | 0.9214         | y=0.1384+4.6998x          |
|      | H     | 83.33                                          | 82.54  | 85.71  | 84.39 | 14.55 |       |       | 18.01            | 0.9830         | y=3.3433+1.3418x          |
|      | I     | 98.85                                          | 92.20  | 86.01  | 75.46 | 68.12 | 59.33 | 29.78 | 6.34             | 0.9780         | y=3.9164+1.3514x          |
|      | J     | 92.78                                          | 77.58  | 59.54  | 40.46 | 23.97 |       |       | 33.76            | 0.9960         | y=2.2919+1.7718x          |
| 4b   | A     | 91.47                                          | 85.52  | 71.59  | 65.18 | 37.60 |       |       | 17.42            | 0.9840         | y=3.3339+1.3425x          |
|      | B     | 100.00                                         | 100.00 | 94.67  | 83.11 | 43.56 |       |       | 15.10            | 0.9525         | y=0.6258+4.7722x          |
|      | C     | 95.38                                          | 93.75  | 72.73  | 58.81 | 39.77 |       |       | 18.21            | 0.9814         | y=2.8246+1.7260x          |
|      | D     | 100.00                                         | 100.00 | 93.13  | 79.62 | 52.13 | 39.57 |       | 10.97            | 0.9354         | y=0.8710+3.9692x          |
|      | E     | 86.95                                          | 76.24  | 50.28  | 45.30 | 40.88 |       |       | 27.83            | 0.9490         | y=3.3005+1.1764x          |
|      | F     | 99.54                                          | 95.20  | 77.60  | 63.20 | 52.27 | 49.07 |       | 10.78            | 0.9464         | y=3.1980+1.7448x          |
|      | G     | 100.00                                         | 99.09  | 82.27  | 72.27 | 40.23 |       |       | 18.85            | 0.9422         | y=0.1963+4.0745x          |
|      | H     | 100.00                                         | 100.00 | 100.00 | 68.30 | 25.13 |       |       | 13.71            | 0.8820         | y=0.9929+5.2702x          |
|      | I     | 100.00                                         | 100.00 | 96.08  | 93.21 | 83.29 | 59.53 | 43.28 | 5.39             | 0.9361         | y=2.7575+3.0642x          |
|      | J     | 92.50                                          | 86.70  | 70.64  | 59.17 | 38.53 |       |       | 18.98            | 0.9961         | y=3.1561+1.4426x          |
| 4c   | A     | 83.19                                          | 76.34  | 59.44  | 39.44 | 17.18 |       |       | 40.82            | 0.9873         | y=2.4300+1.5954x          |
|      | B     | 100.00                                         | 100.00 | 100.00 | 76.53 | 39.91 | 21.36 |       | 10.54            | 0.9224         | y=0.2423+4.6520x          |
|      | C     | 99.29                                          | 93.75  | 72.73  | 58.81 | 39.77 |       |       | 19.58            | 0.9822         | y=2.1101+2.2371x          |
|      | D     | 100.00                                         | 100.00 | 95.71  | 85.10 | 64.90 | 47.73 |       | 9.36             | 0.9396         | y=1.329+3.7788x           |

|    |   |        |        |        |       |       |       |        |        |                   |
|----|---|--------|--------|--------|-------|-------|-------|--------|--------|-------------------|
|    | E | 65.94  | 56.25  | 42.61  | 32.39 | 14.77 |       | 77.68  | 0.9861 | y=2.7843+1.1721x  |
|    | F | 83.45  | 70.03  | 60.47  | 53.49 | 44.19 |       | 20.67  | 0.9834 | y=3.8316+0.8883x  |
|    | G | 99.81  | 98.67  | 91.33  | 65.56 | 49.78 |       | 14.32  | 0.9938 | y=2.0750+2.5301x  |
|    | H | 100.00 | 100.00 | 100.00 | 91.23 | 32.21 |       | 11.02  | 0.8944 | y=0.0437+4.8396   |
|    | I | 97.49  | 91.71  | 82.90  | 78.24 | 52.85 | 36.27 | 10.25  | 0.9915 | y=3.4976+1.4864x  |
|    | J | 98.76  | 93.75  | 72.92  | 58.75 | 32.71 |       | 21.13  | 0.9931 | y=2.0523+2.2250x  |
|    | A | 85.60  | 63.32  | 43.21  | 31.52 | 23.37 |       | 49.63  | 0.9750 | y=2.5216+1.4615x  |
|    | B | 52.25  | 28.50  | 12.00  | 10.50 | 4.25  |       | 229.37 | 0.9740 | y=1.6727+1.4095x  |
|    | C | 85.28  | 60.15  | 46.70  | 28.93 | 19.54 |       | 52.94  | 0.9840 | y=2.3513+1.5386x  |
|    | D | 96.50  | 75.27  | 66.96  | 51.20 | 35.01 |       | 24.62  | 0.9600 | y=2.6676+1.6764x  |
| 4d | E | 14.95  | 5.93   | 3.61   | 0.77  | 1.03  |       | 113.18 | 0.9910 | y=2.1440+1.3906x  |
|    | F | 89.08  | 64.56  | 45.87  | 33.50 | 21.36 |       | 46.15  | 0.9870 | y=2.3193+1.6108x  |
|    | G | 28.54  | 13.93  | 7.08   | 2.05  | 4.11  |       | 906.84 | 0.9070 | y=1.7565+1.0967x  |
|    | H | 58.98  | 16.99  | 7.04   | /     | /     |       | 181.88 | 0.9755 | y=1.3802+2.8234x  |
|    | I | 93.13  | 67.94  | 55.73  | 42.24 | 31.55 |       | 32.56  | 0.9550 | y=2.6915+1.5259x  |
|    | J | 92.40  | 73.53  | 60.78  | 39.71 | 29.66 |       | 32.12  | 0.9850 | y=2.5855+1.6024x  |
|    | A | 83.77  | 63.87  | 45.55  | 32.20 | 21.20 |       | 50.53  | 0.9904 | y=2.5178+1.14571x |
|    | B | 83.57  | 49.77  | 16.90  | 8.45  | 4.23  |       | 94.06  | 0.9743 | y=0.5602+2.2499x  |
| 4e | C | 79.14  | 67.91  | 55.88  | 44.12 | 34.76 |       | 33.31  | 0.9980 | y=3.4729+1.0030x  |
|    | D | 92.16  | 87.84  | 80.59  | 70.59 | 45.10 |       | 11.77  | 0.9783 | y=3.6825+1.2303x  |
|    | E | 45.45  | 28.48  | 22.73  | 14.55 | 8.48  |       | 296.61 | 0.9926 | y=2.5316+0.9985x  |
|    | F | 88.18  | 77.83  | 63.05  | 46.31 | 15.27 |       | 36.81  | 0.9820 | y=2.2550+1.7530x  |
|    | G | 82.38  | 54.76  | 27.62  | 12.86 | 6.67  |       | 81.94  | 0.9894 | y=1.1135+2.0311x  |
|    | H | 58.33  | 32.22  | 26.11  | 8.33  | 6.11  |       | 165.09 | 0.9791 | y=1.7338+1.4728x  |
|    | I | 93.25  | 73.25  | 51.75  | 30.75 | 21.75 |       | 40.37  | 0.9833 | y=1.9727+1.8849x  |
|    | J | 98.16  | 73.16  | 47.63  | 36.32 | 23.16 |       | 36.03  | 0.9428 | y=1.5816+2.1960x  |
| 4f | A | 44.92  | 36.80  | 30.20  | 26.90 | 21.32 |       | 391.04 | 0.9935 | y=3.6101+0.5362x  |
|    | B | 49.56  | 45.13  | 34.96  | 26.99 | 23.01 |       | 189.69 | 0.9913 | y=3.5276+0.6464x  |
|    | C | 53.03  | 41.67  | 31.82  | 19.70 | 15.66 |       | 168.86 | 0.9945 | y=2.9198+0.9338x  |

|                |   |        |        |        |        |        |        |       |          |        |                  |
|----------------|---|--------|--------|--------|--------|--------|--------|-------|----------|--------|------------------|
|                | D | 70.29  | 50.59  | 44.41  | 38.24  | 11.18  |        |       | 74.83    | 0.9450 | y=2.6259+1.2668x |
|                | E | 17.20  | 12.37  | 10.48  | 8.06   | 6.45   |        |       | 26411.41 | 0.9926 | y=2.9613+0.4610x |
|                | F | 75.12  | 65.61  | 51.22  | 25.37  | 11.71  |        |       | 61.94    | 0.9867 | y=2.1423+1.5947x |
|                | G | 47.02  | 35.78  | 22.94  | 13.76  | 5.05   |        |       | 203.90   | 0.9933 | y=2.0407+1.2814x |
|                | H | 41.11  | 35.93  | 28.15  | 20.74  | 11.11  |        |       | 306.31   | 0.9808 | y=2.9790+0.8129x |
|                | I | 59.15  | 49.79  | 45.96  | 31.91  | 20.43  |        |       | 93.84    | 0.9801 | y=3.3092+0.8572x |
|                | J | 41.67  | 20.83  | 14.72  | 10.00  | 5.00   |        |       | 398.38   | 0.9617 | y=2.1164+1.1089x |
| Chlorothalonil | A | 65.38  | 64.36  | 58.97  | 58.68  | 57.96  | 55.32  | 44.28 | 3.98     | 0.9154 | y=4.8496+0.2507x |
|                | B | 100.00 | 100.00 | 100.00 | 100.00 | 100.00 | 55.81  | 32.47 | 1.81     | 0.7978 | y=4.2020+3.0936x |
|                | C | 69.13  | 63.56  | 55.49  | 47.12  | 43.99  |        |       | 27.09    | 0.9915 | y=4.1811+0.5715x |
|                | D | 100.00 | 100.00 | 100.00 | 100.00 | 100.00 | 93.08  | 86.00 | 0.43     | 0.7974 | y=5.8195+2.2302x |
|                | E | 100.00 | 100.00 | 100.00 | 100.00 | 100.00 | 33.36  | 21.99 | 2.41     | 0.7948 | y=3.7253+3.3435x |
|                | F | 82.40  | 73.95  | 73.19  | 72.54  | 66.63  | 63.14  | 59.18 | 0.67     | 0.9657 | y=5.805+0.3438x  |
|                | G | 100.00 | 100.00 | 100.00 | 100.00 | 100.00 | 45.98  | 42.98 | 1.74     | 0.7916 | y=4.2630+3.0534x |
|                | H | 100.00 | 100.00 | 100.00 | 100.00 | 100.00 | 100.00 | 59.39 | 0.07     | 0.6121 | y=3.8390+5.1823x |
|                | I | 91.14  | 90.13  | 89.37  | 89.11  | 78.73  | 77.68  | 74.39 | 0.09     | 0.9385 | y=5.4523+0.4256x |
|                | J | 100.00 | 100.00 | 100.00 | 100.00 | 100.00 | 50.96  | 25.03 | 2.05     | 0.7984 | y=4.0043+3.2005x |

Note: A: *Fusarium oxysporum f.sp. niveum* (*F. oxysporum f.sp. niveum*), B: *Phytophthora nicotianae var.nicotianae* (*P. nicotianae var.nicotianae*), C: *Colletotrichum acutatum* (*C. acutatum*), D: *Rhizoctonia solani* (*R. solani*) , E: *Coriolus versicolor* (*C. versicolor*) , F: *Fusarium verticillioides* (*F. verticillioides*), G: *Diplodia pinea* (*D. pinea*), H: *Poria vaporaria*(*P. vaporaria*), I: *Fusicoccumaesculi*, J: *Colletotrichum gloeosporioides* (*C. gloeosporioides*)

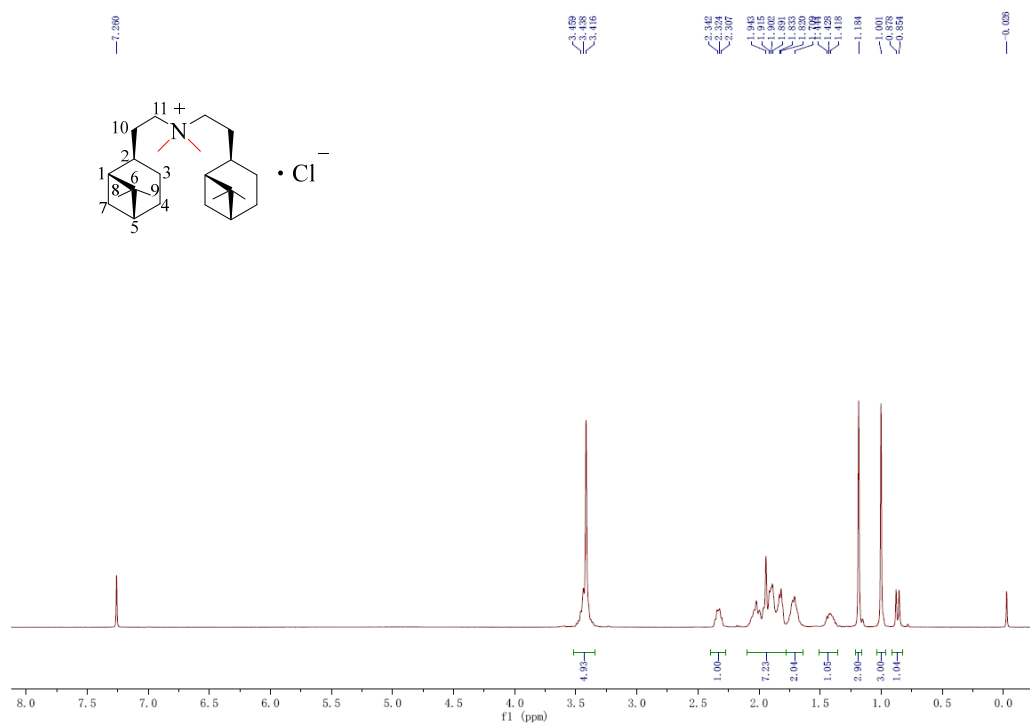

**Figure S1.** The  $^1\text{H}$  NMR spectra of Compound 4a.

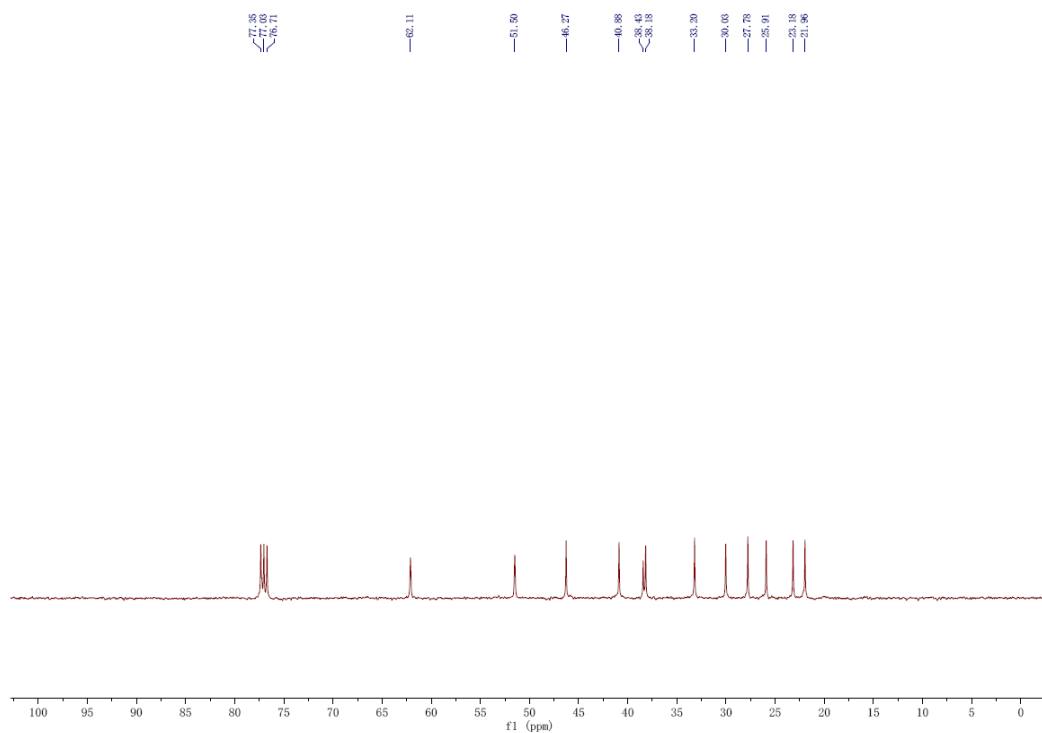

**Figure S2.** The  $^{13}\text{C}$  NMR spectra of Compound 4a.

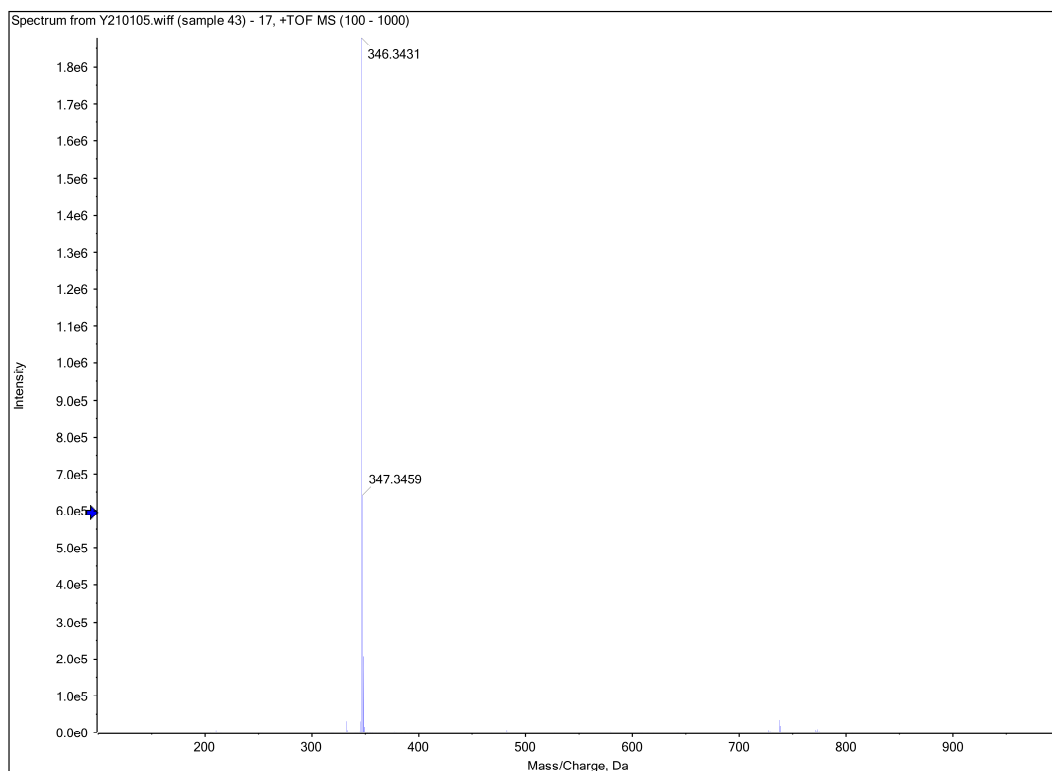

3/16/2021 1:34:48 PM

**Figure S3.** The HRMS spectra of Compound 4a.

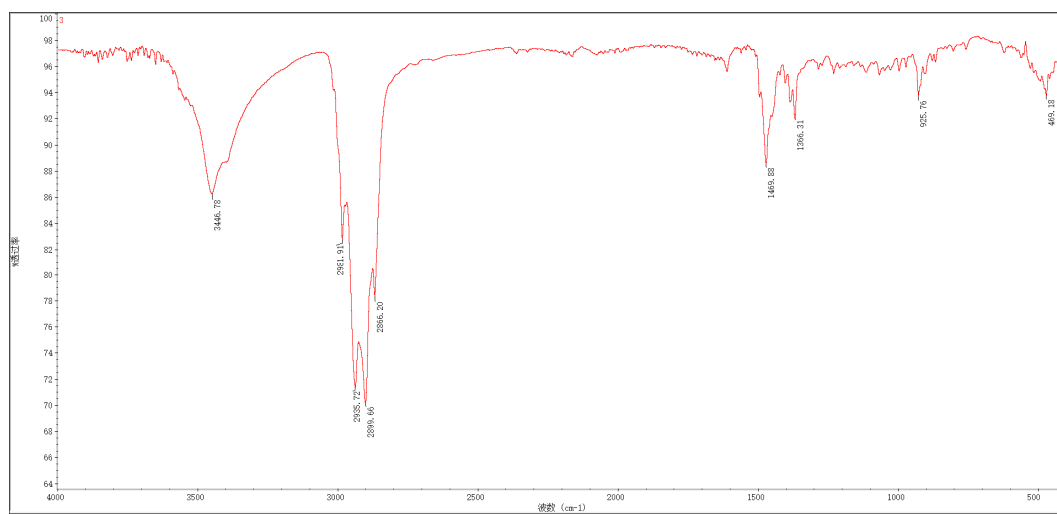

**Figure S4.** The FT-IR spectra of Compound 4a.

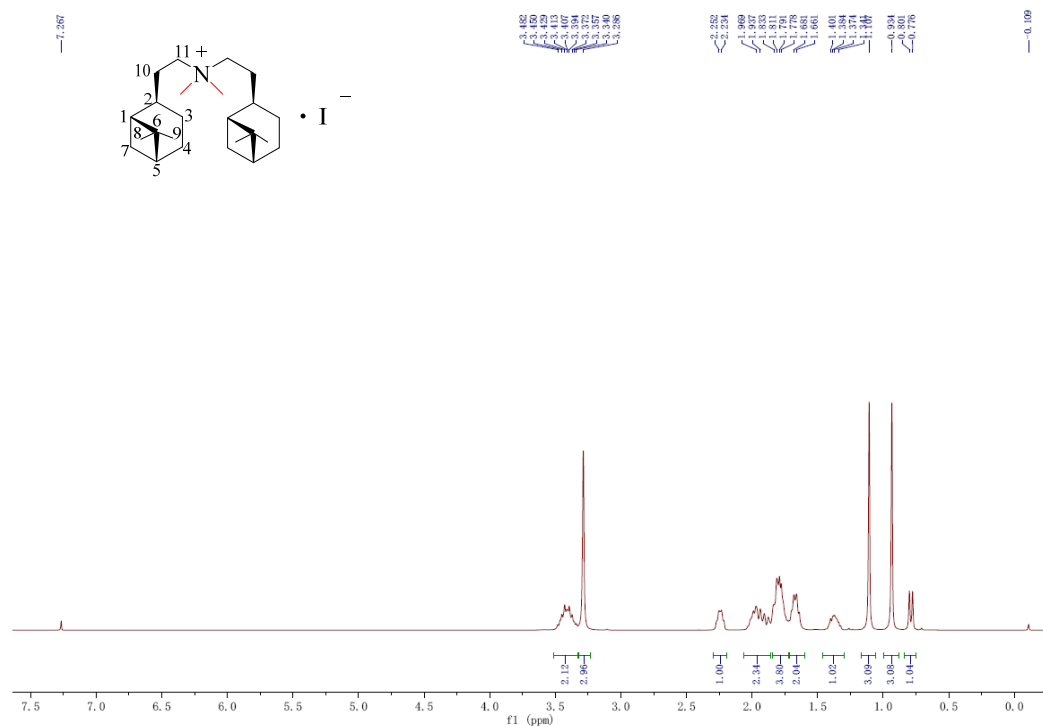

**Figure S5.** The <sup>1</sup>H NMR spectra of Compound 4a.

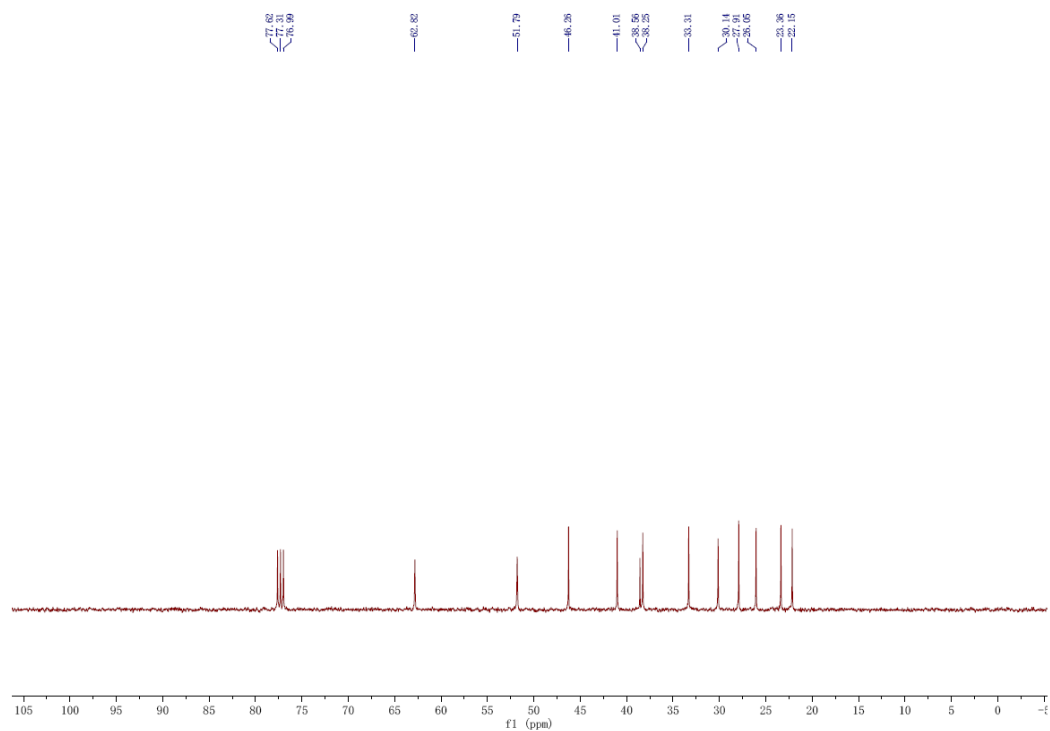

**Figure S6.** The <sup>13</sup>C NMR spectra of Compound 4b.

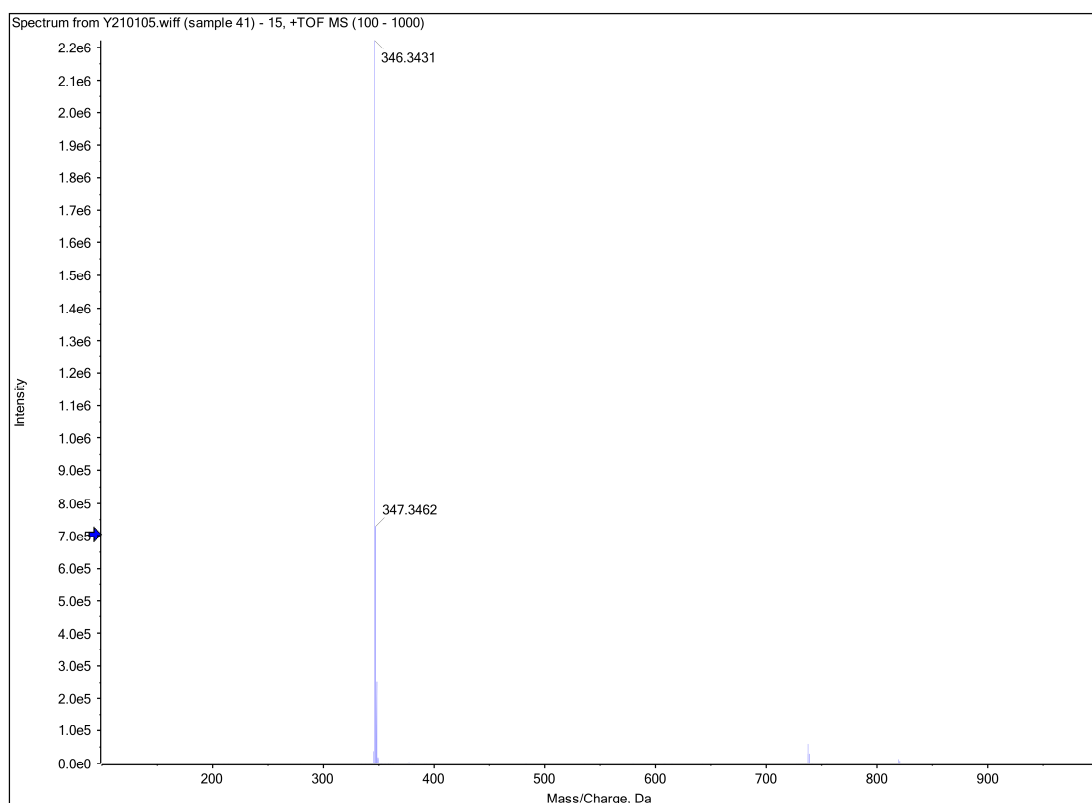

3/16/2021 1:33:44 PM

Figure S7. The HRMS spectra of Compound 4b.

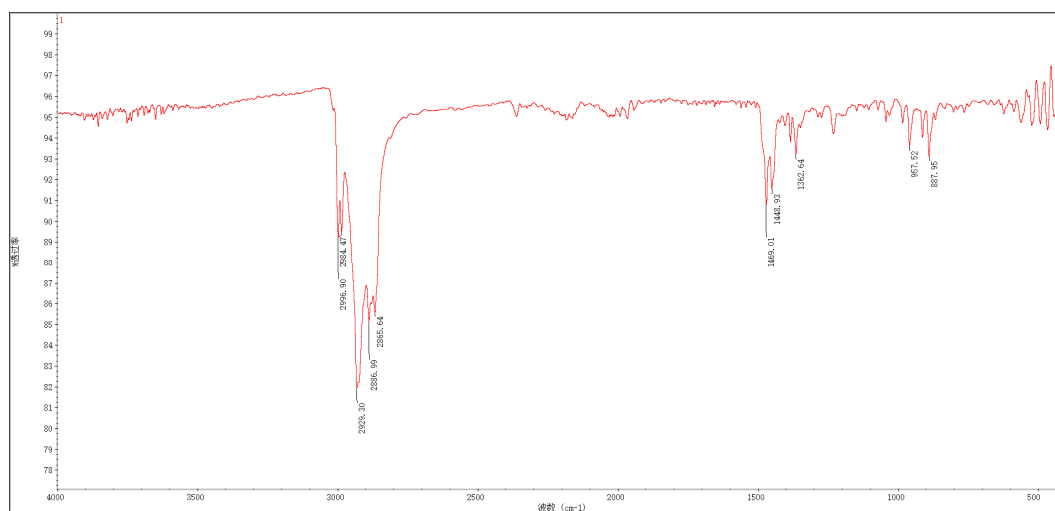

Figure S8. The FT-IR spectra of Compound 4b.



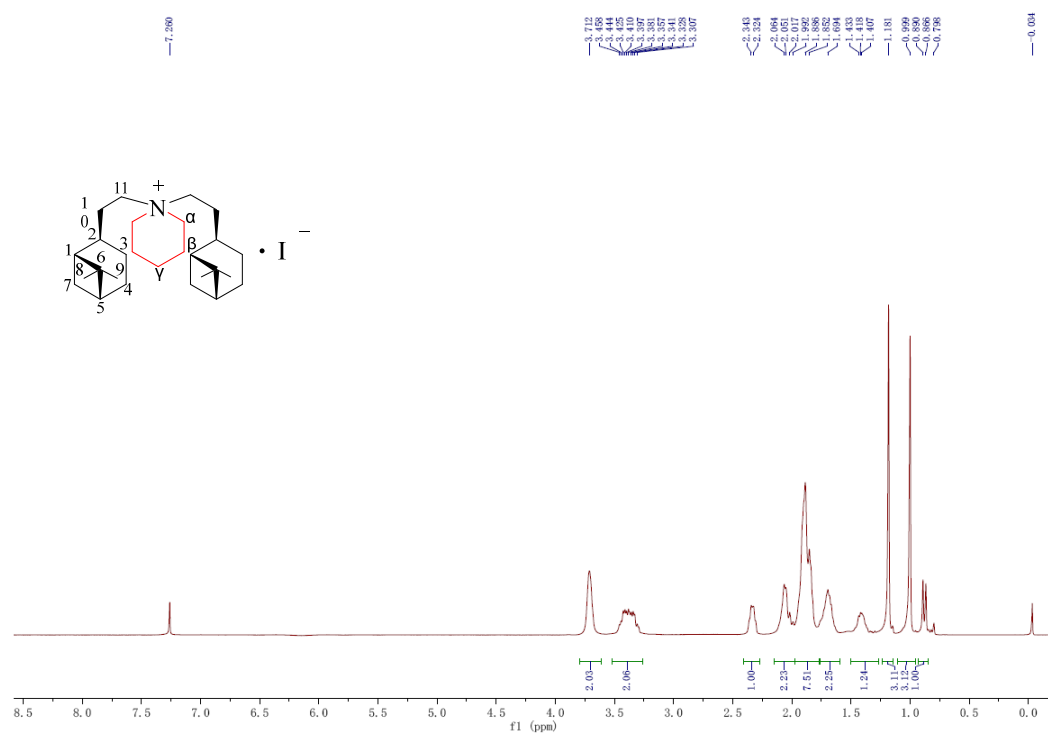

**Figure S9.** The <sup>1</sup>H NMR spectra of Compound 4c.

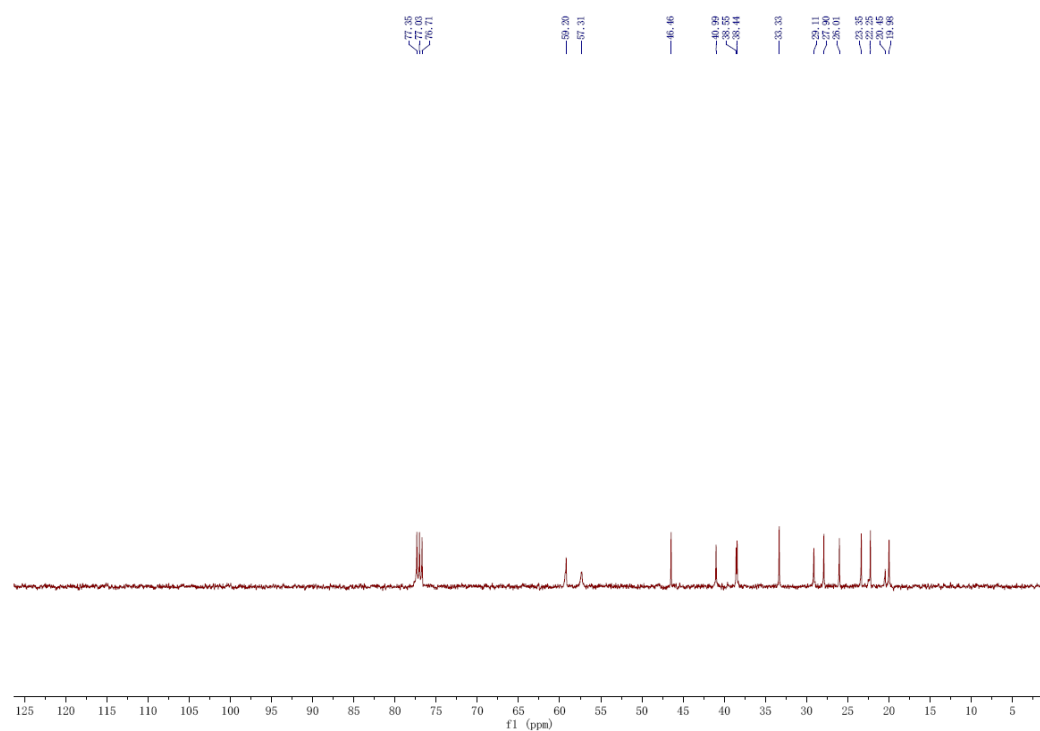

**Figure S10.** The <sup>13</sup>C NMR spectra of Compound 4c.

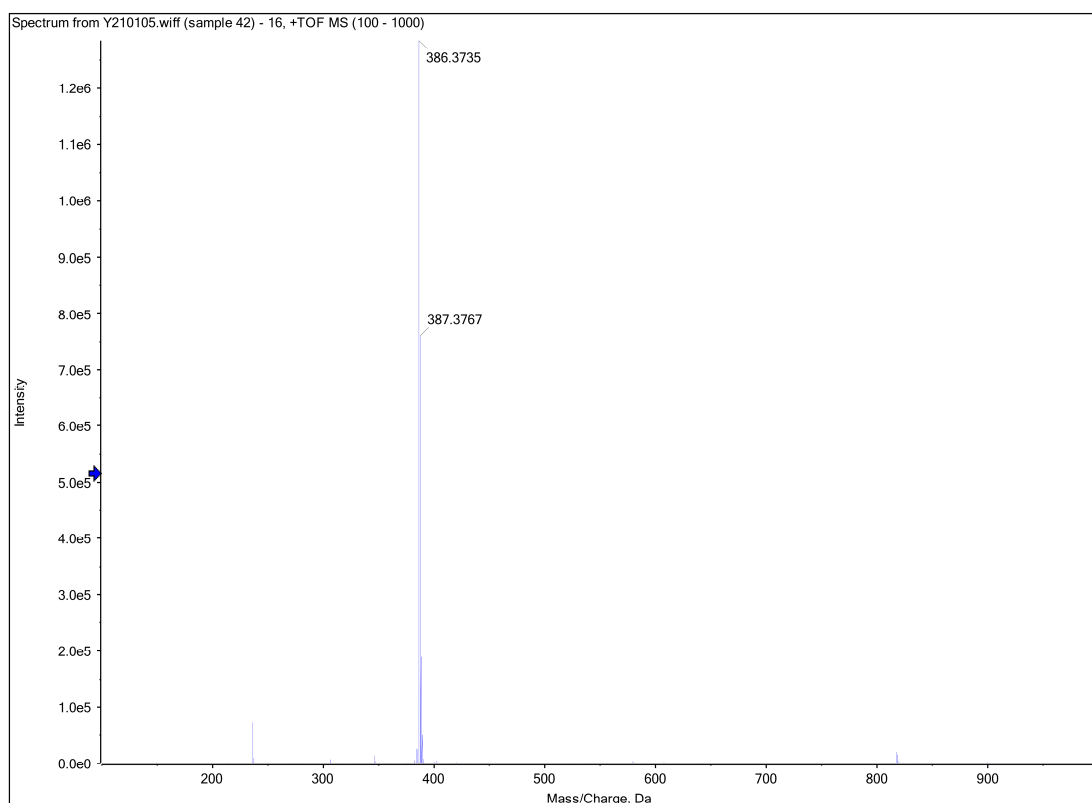

3/16/2021 1:34:20 PM

**Figure S11.** The HRMS spectra of Compound 4c.

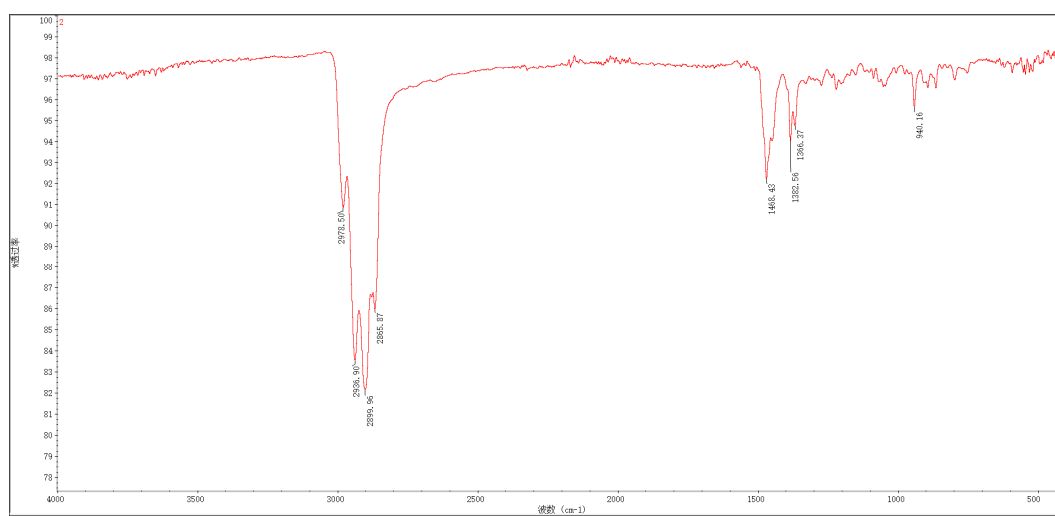

**Figure S12.** The FT-IR spectra of Compound 4c.

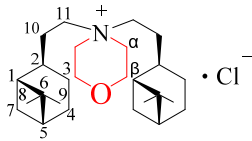

$\begin{matrix} 76.84 \\ 76.73 \\ 76.53 \\ 76.21 \end{matrix}$ 
 $-63.10$ 
 $-56.55$ 
 $-51.25$ 
 $-45.46$ 
 $\begin{matrix} 40.71 \\ 38.44 \\ 38.17 \end{matrix}$ 
 $\begin{matrix} 32.86 \\ 29.97 \\ 27.48 \\ 25.63 \\ 22.77 \\ 21.51 \end{matrix}$ 
 $-0.52$

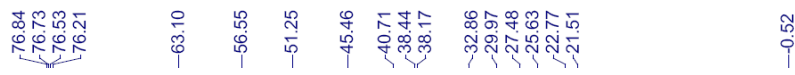

**Figure S14.** The  $^{13}\text{C}$  NMR spectra of Compound 4d.

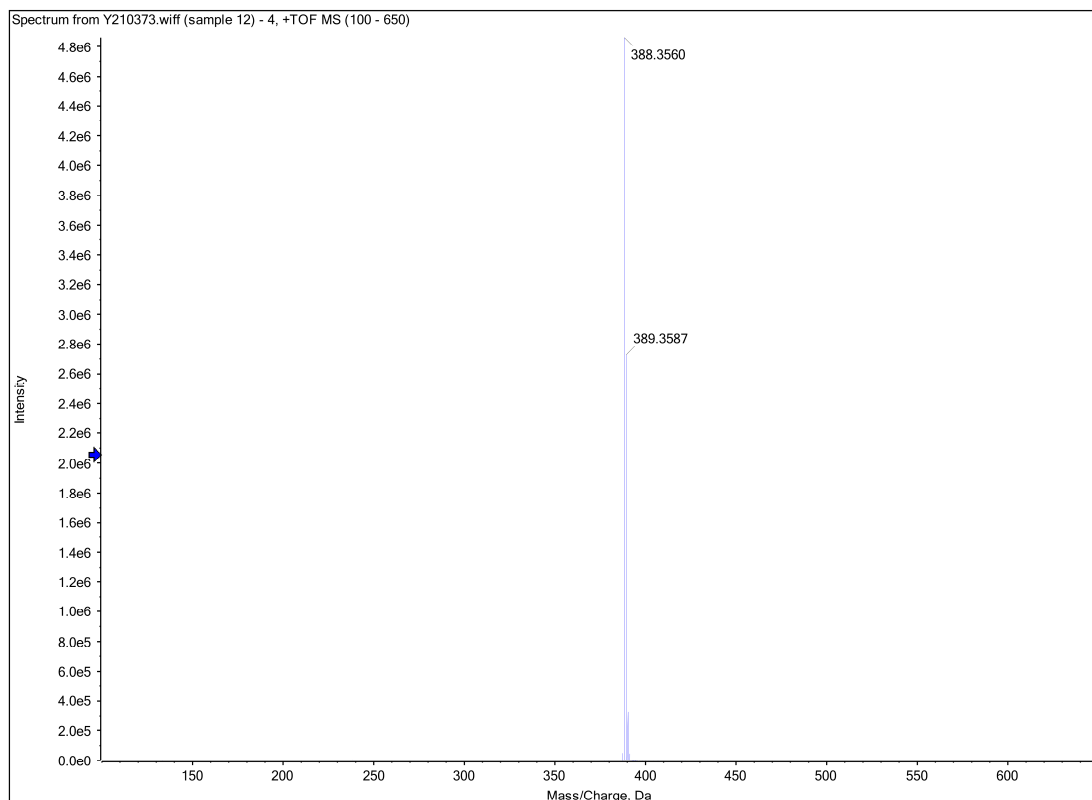

6/30/2021 4:27:34 PM

**Figure S15.** The HRMS spectra of Compound 4d.

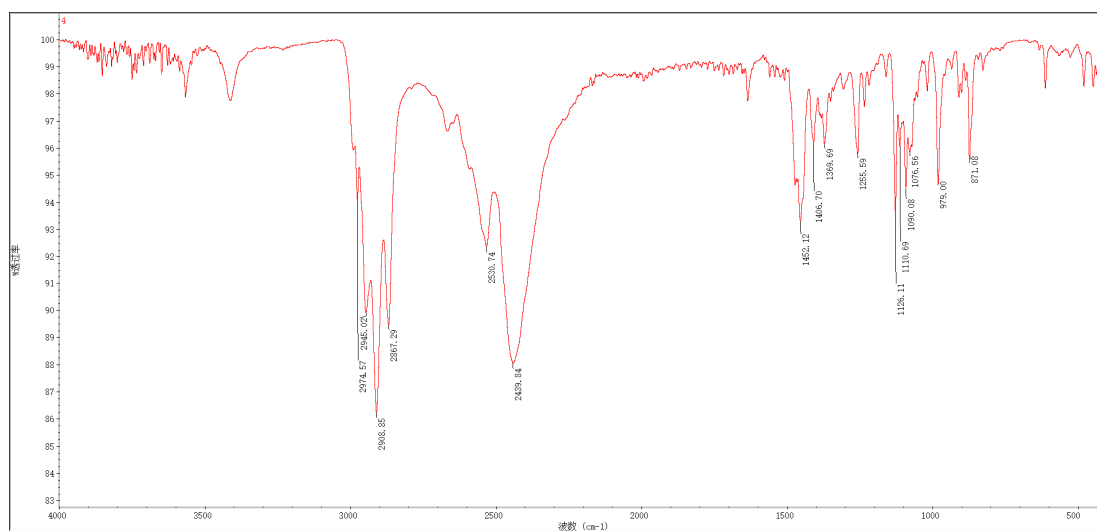

**Figure 16.** The FT-IR spectra of Compound 4d.

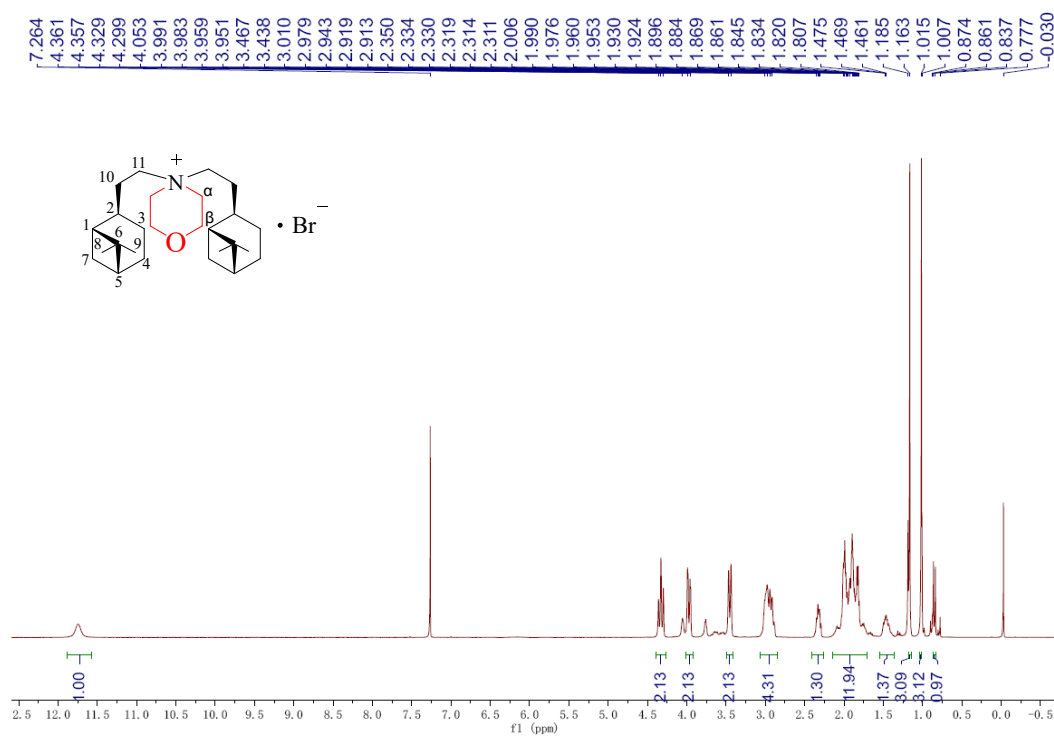

Figure S17. The <sup>1</sup>H NMR spectra Compound 4e.

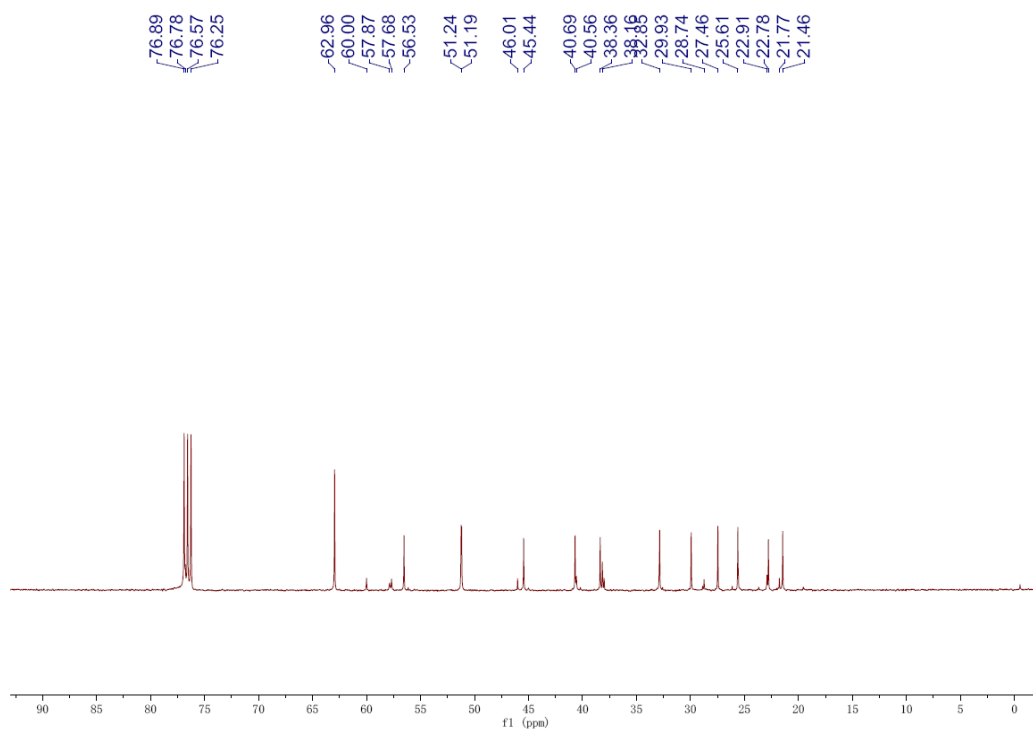

Figure S16. The <sup>13</sup>C NMR spectra of Compound 4e.

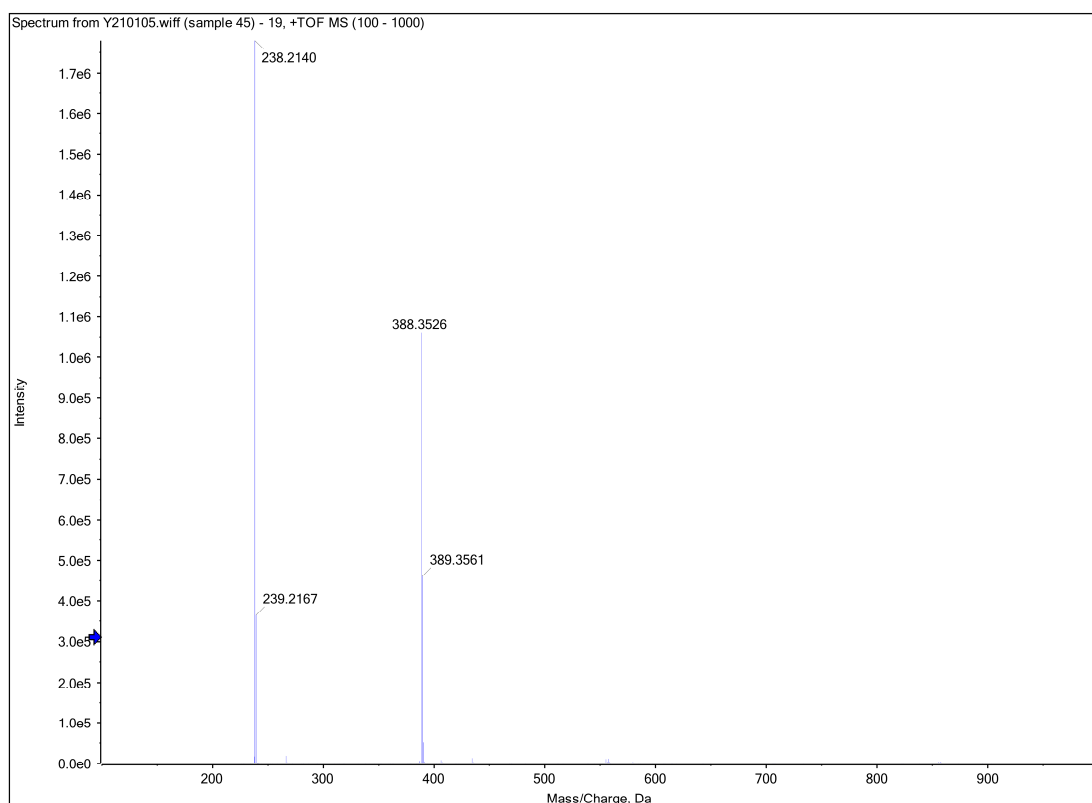

3/16/2021 1:38:19 PM

**Figure S19.** The HRMS spectra of Compound 4e.

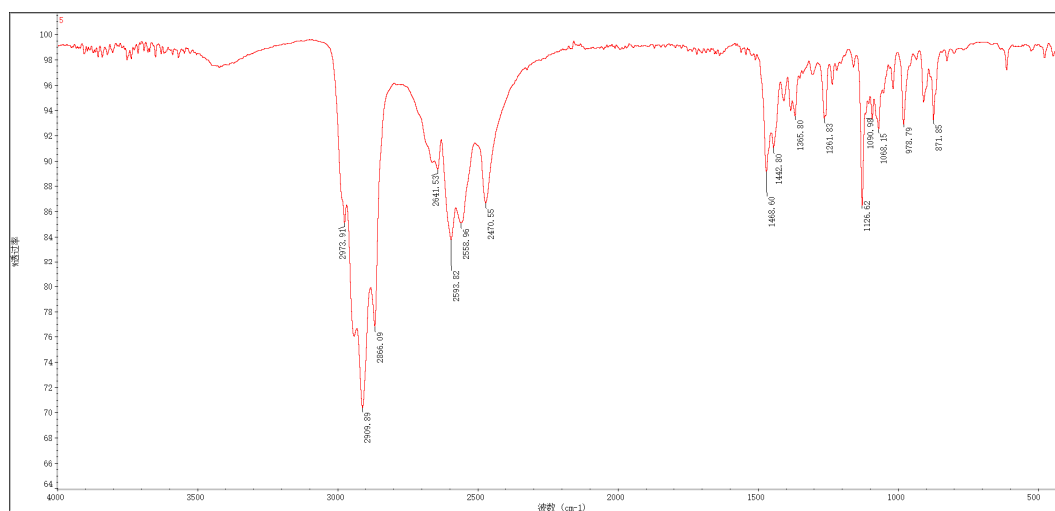

**Figure S20.** The FT-IR spectra of Compound 4e.

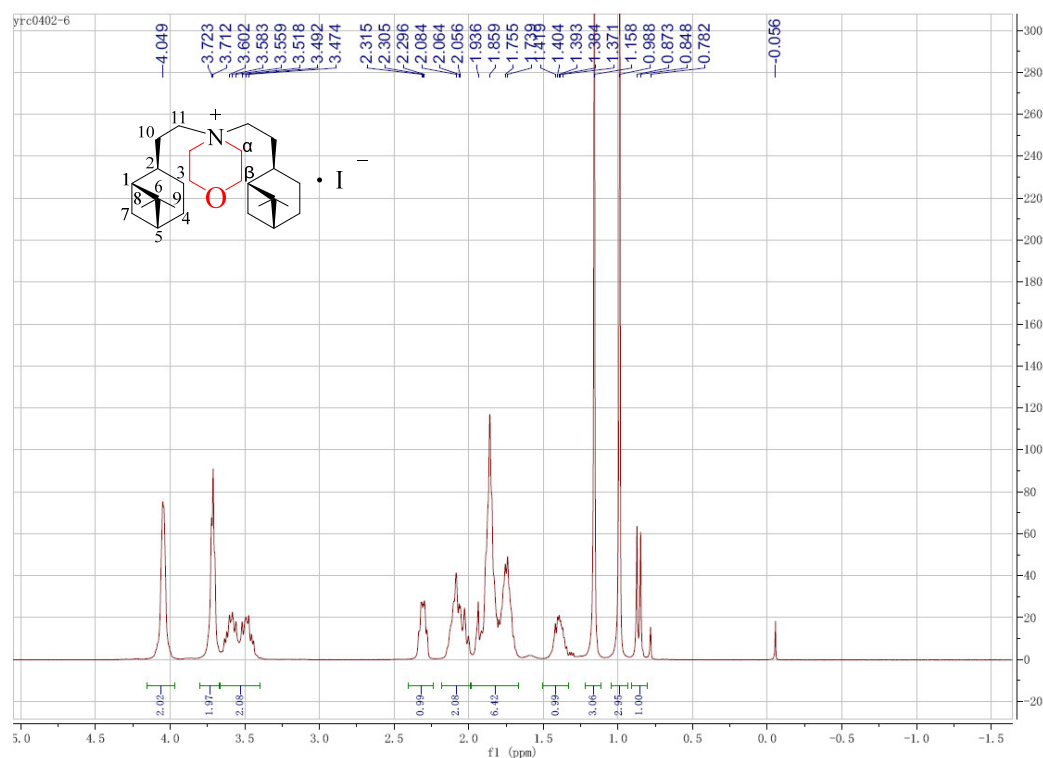

Figure S21. The  $^1\text{H}$  NMR spectra Compound 4f.

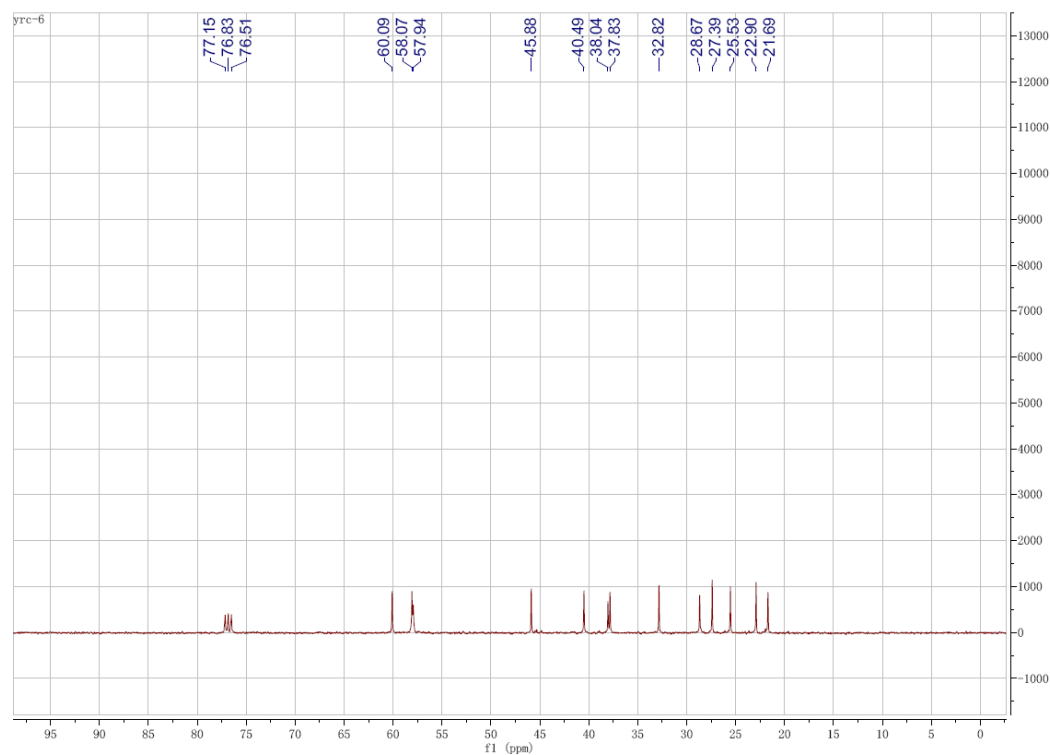

Figure S22. The  $^{13}\text{C}$  NMR spectra of Compound 4f.

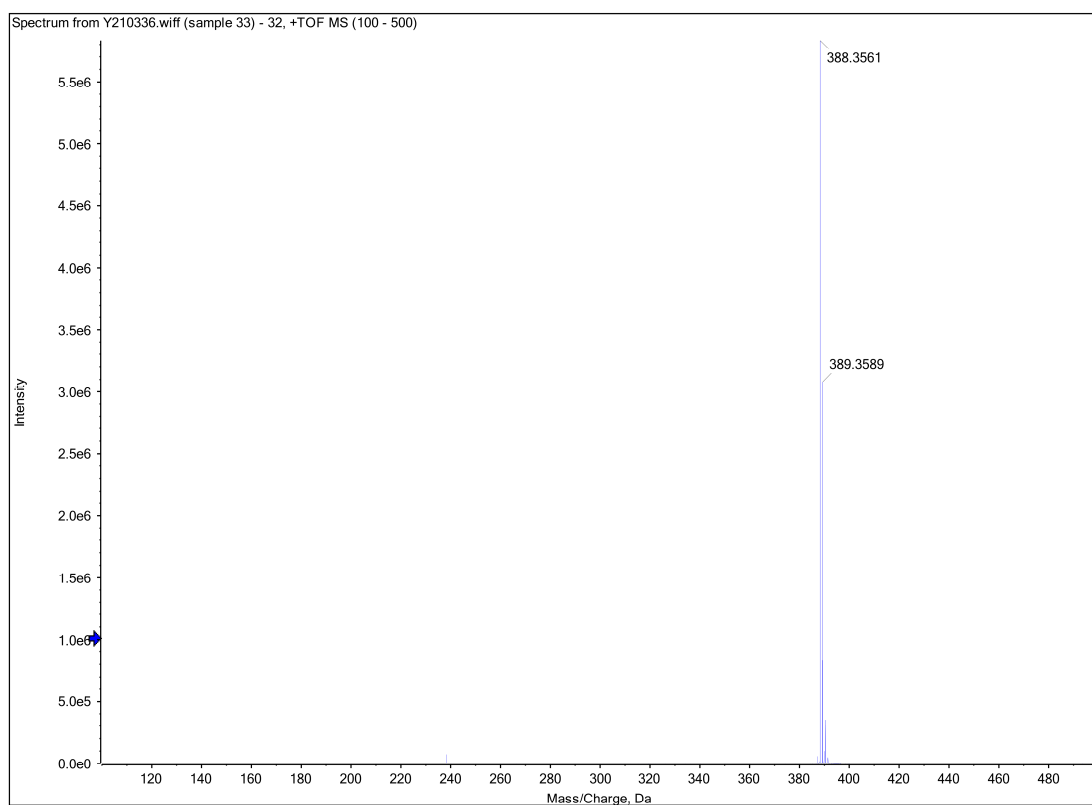

6/11/2021 6:38:34 PM

**Figure S23.** The HRMS spectra of Compound 4f.

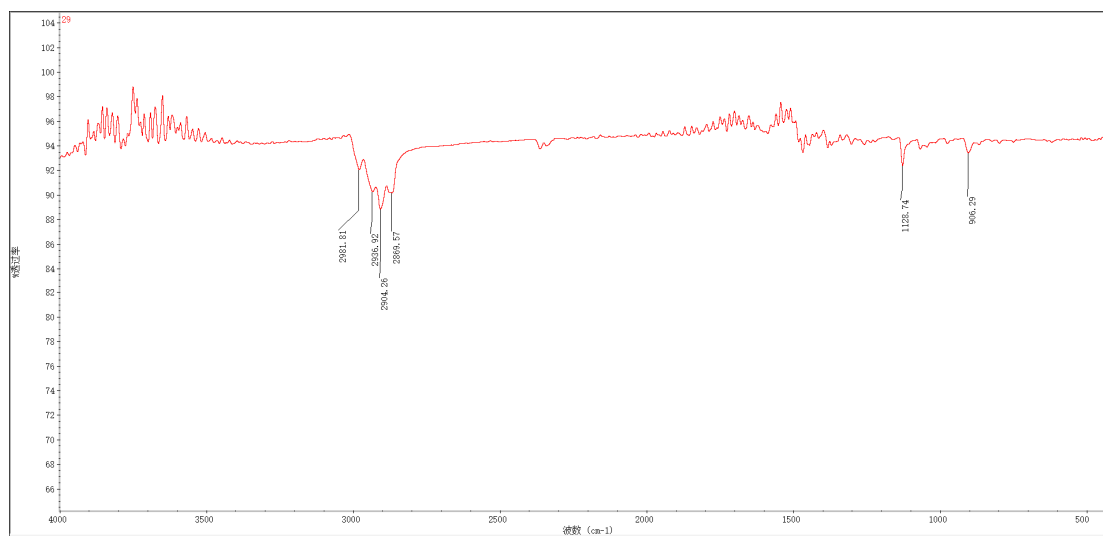

**Figure S24.** The FT-IR spectra of Compound 4f.
